# Supplementary material for: NF-κB activation by Helicobacter pylorirequires Akt-mediated phosphorylation of p65
Source: Springer Nature journal article supplement (doi:10.1186/1471-2180-9-36), 2009-02-12

*H. pylori* (+)

**A**

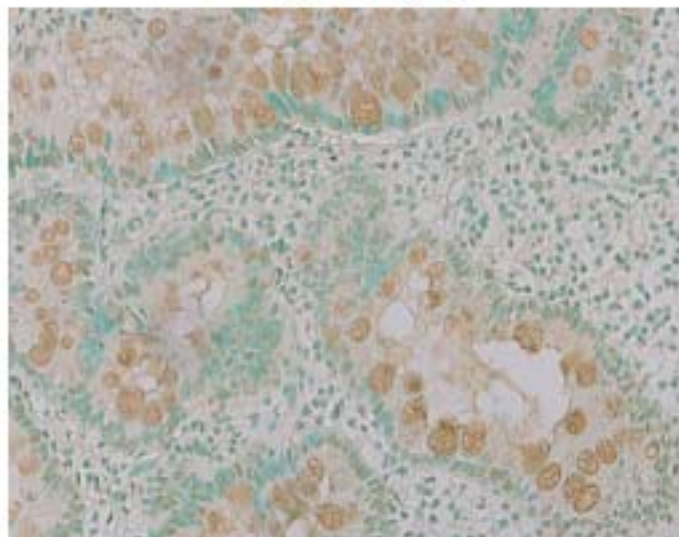

**B**

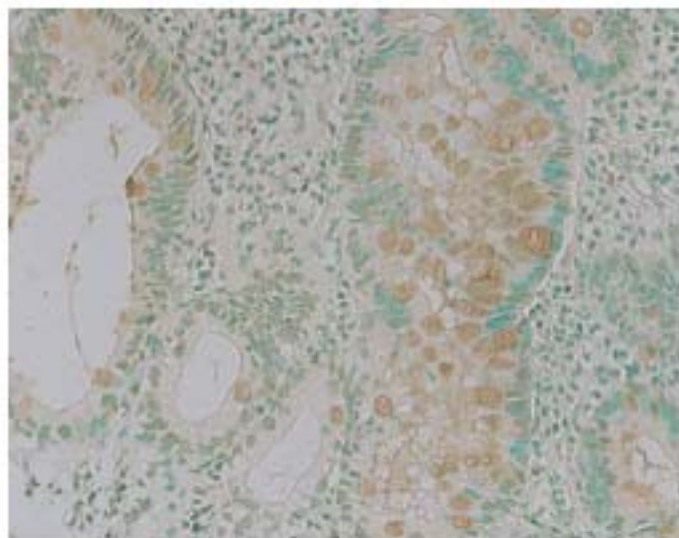

*H. pylori* (-)

**C**

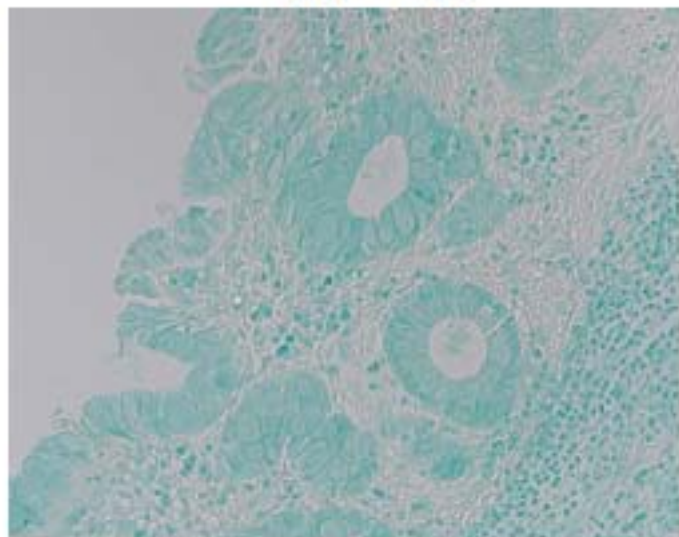

**D**

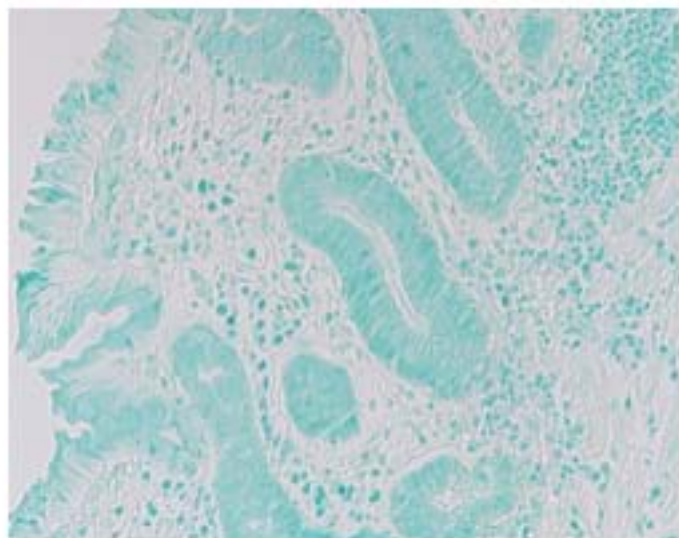

Supplement: 12866_2008_707_MOESM1_ESM.pdf [file 12866_2008_707_MOESM1_ESM.pdf]
