# Supplementary material for: NF-κB activation by Helicobacter pylorirequires Akt-mediated phosphorylation of p65
Source: Springer Nature journal article supplement (doi:10.1186/1471-2180-9-36), 2009-02-12

**A**

ATCC 49503

MKN45

AGS

Time 0 30 60 120 180 0 30 60 120 180 min

Akt

p-Akt  
(Ser473)p-Akt  
(Thr308)

p65

p-p65  
(Ser536)I $\kappa$ B $\alpha$ p-I $\kappa$ B $\alpha$   
(Ser32/Ser36)

Actin

Akt assay

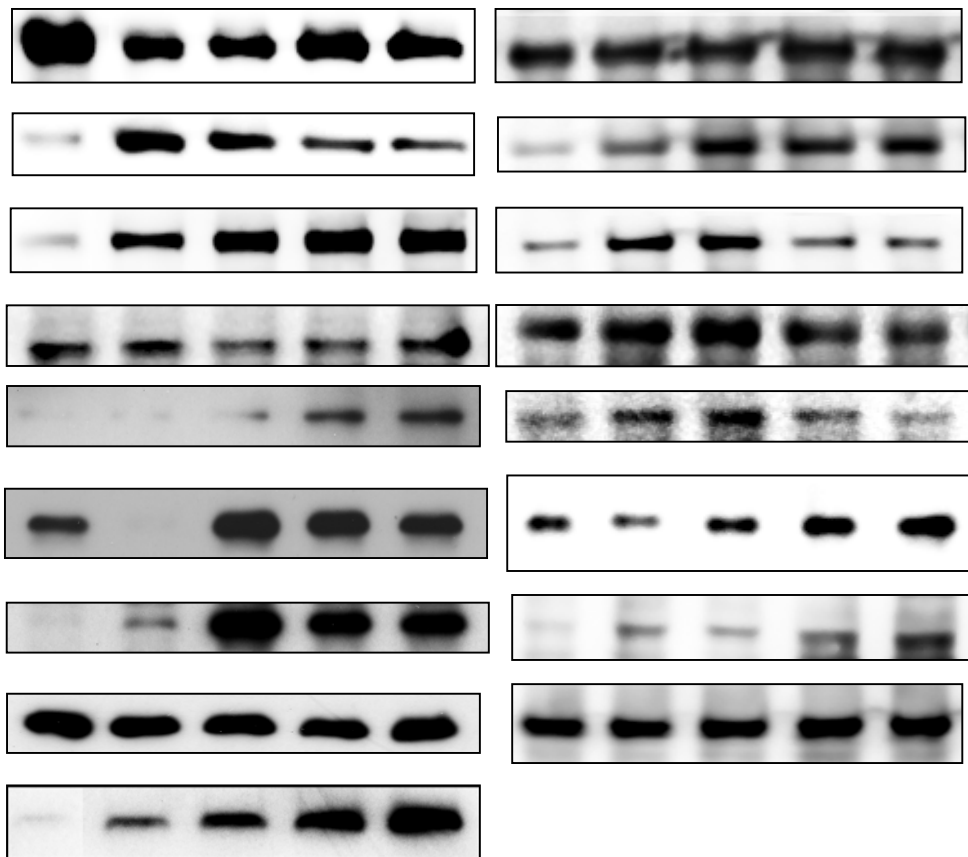**B**

26695 (WT)

26695 ( $\Delta$  cag)

-

Akt

p-Akt  
(Ser473)p-Akt  
(Thr308)

Actin

MKN45

Akt

p-Akt  
(Ser473)p-Akt  
(Thr308)

Actin

AGS

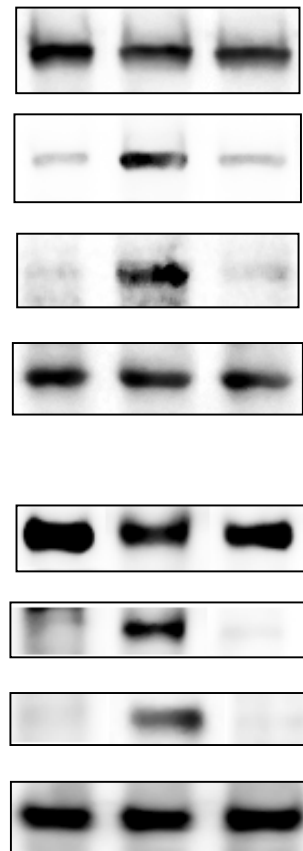

Supplement: 12866_2008_707_MOESM3_ESM.pdf [file 12866_2008_707_MOESM3_ESM.pdf]
