# Supplementary material for: NF-κB activation by Helicobacter pylorirequires Akt-mediated phosphorylation of p65
Source: Springer Nature journal article supplement (doi:10.1186/1471-2180-9-36), 2009-02-12

**A**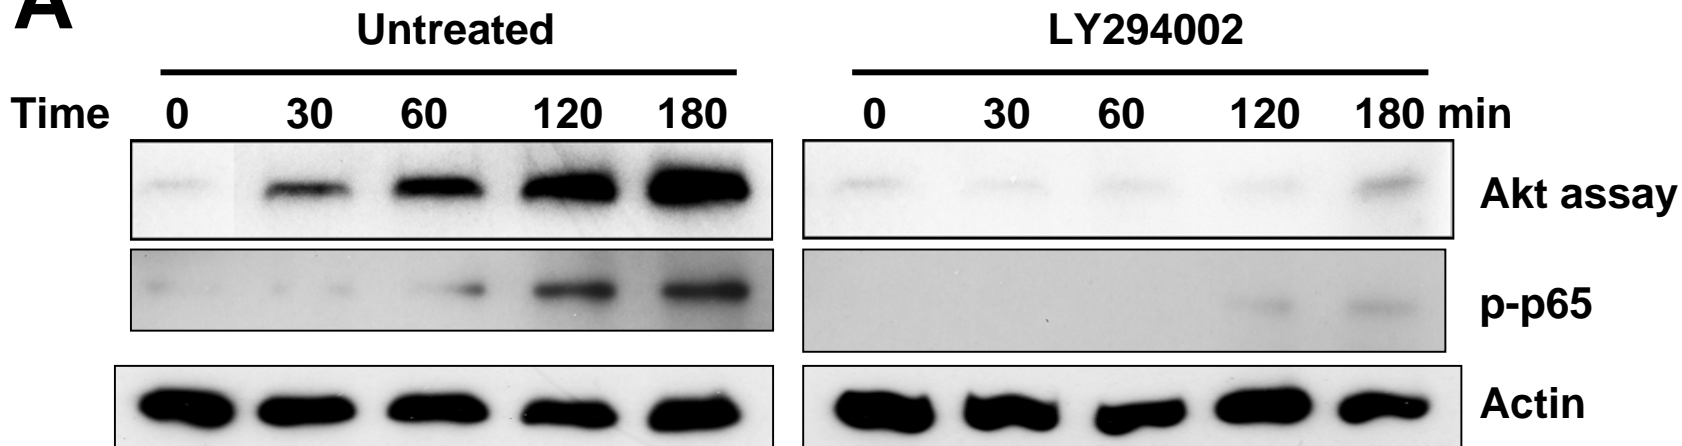**B**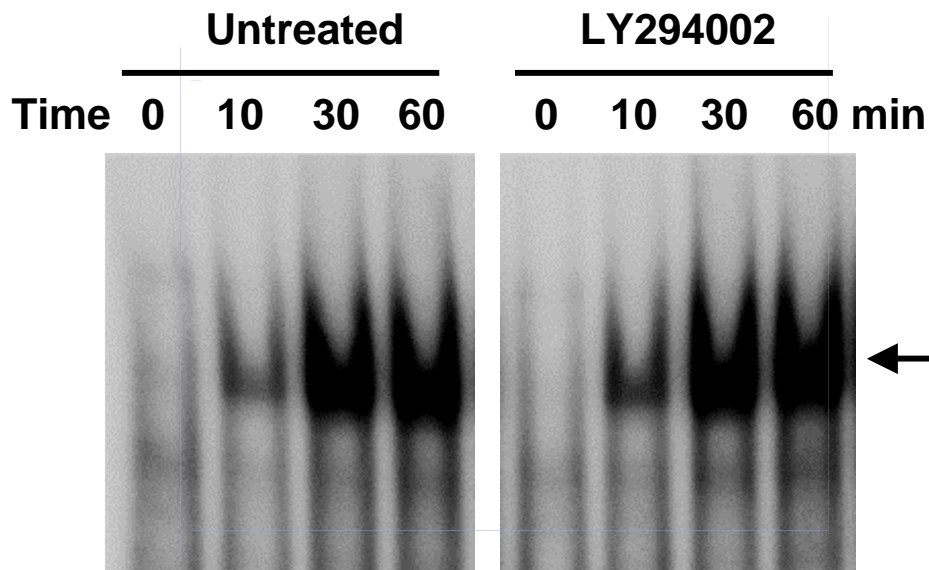**C**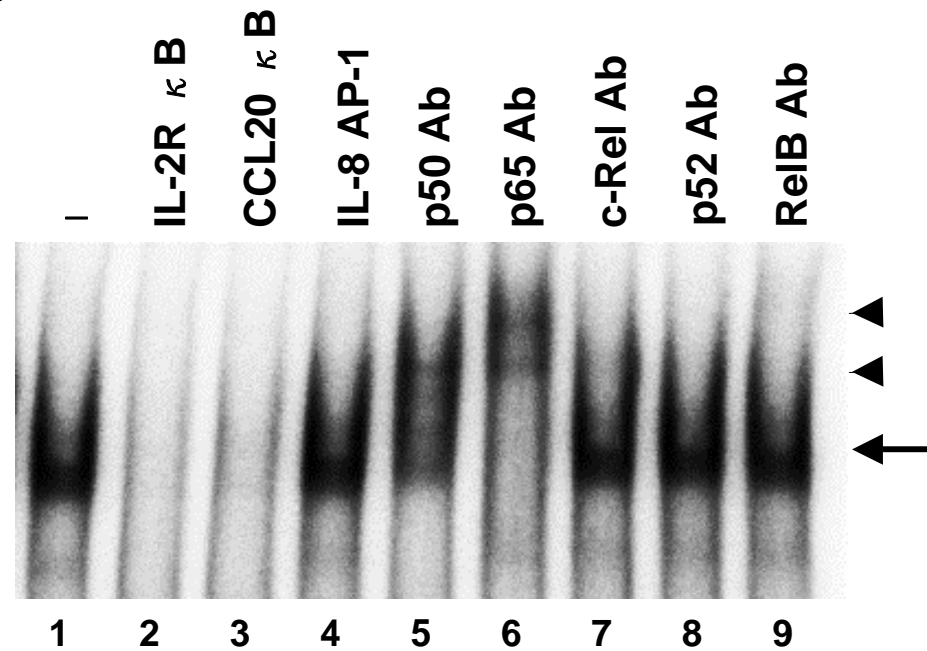

Supplement: 12866_2008_707_MOESM4_ESM.pdf [file 12866_2008_707_MOESM4_ESM.pdf]
