# Supplementary material for: NF-κB activation by Helicobacter pylorirequires Akt-mediated phosphorylation of p65
Source: Springer Nature journal article supplement (doi:10.1186/1471-2180-9-36), 2009-02-12
Supplement: 12866_2008_707_MOESM7_ESM.pdf [file 12866_2008_707_MOESM7_ESM.pdf]

| siRNA            | Control |   | p65 |   |
|------------------|---------|---|-----|---|
| <i>H. pylori</i> | -       | + | -   | + |

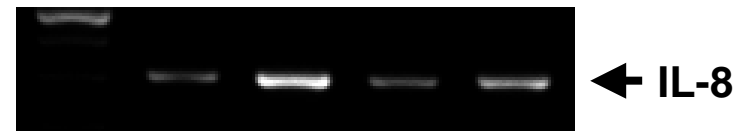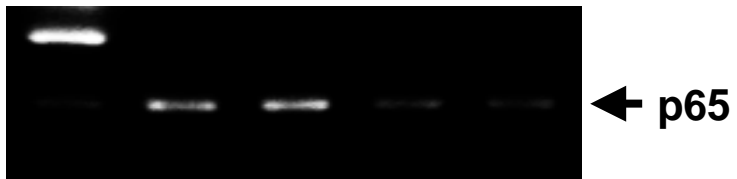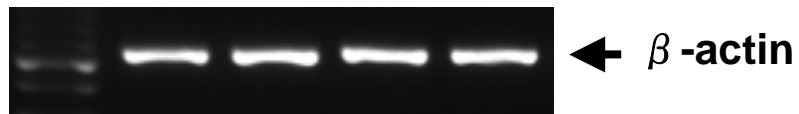

M

| siRNA            | Control |   | Akt |   |
|------------------|---------|---|-----|---|
| <i>H. pylori</i> | -       | + | -   | + |

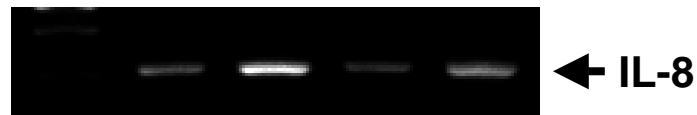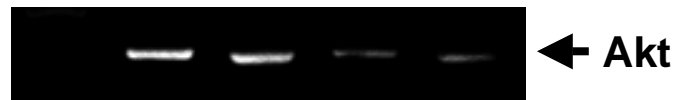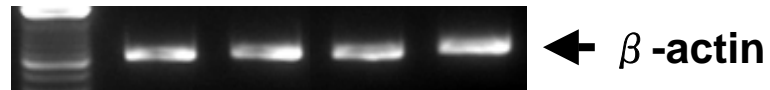

M
